# Supplementary material
Source: PubMed Central journal article supplement (PMC4442058)
Supplement: NIHMS677985-supplement-Legacy_Supplemental_File.pdf [file NIHMS677985-supplement-Legacy_Supplemental_File.pdf]

SUPPLEMENTAL MATERIAL

| <b>Supplemental table I: Association of left atrial size and recurrent ischemic stroke and recurrent cryptogenic or cardioembolic stroke</b> |                                                 |                                        |                                        |
|----------------------------------------------------------------------------------------------------------------------------------------------|-------------------------------------------------|----------------------------------------|----------------------------------------|
|                                                                                                                                              | Left atrial size                                | Model 1*                               | Model 2**                              |
|                                                                                                                                              |                                                 | Hazard ratio (95% confidence interval) | Hazard ratio (95% confidence interval) |
| Recurrent ischemic stroke of any subtype                                                                                                     | Normal Left atrial size                         | reference                              | reference                              |
|                                                                                                                                              | Mild left atrial enlargement                    | <b>1.07 (0.59-1.95)</b>                | <b>1.21(0.67-2.21)</b>                 |
|                                                                                                                                              | Moderate to severe left atrial enlargement      | <b>1.12 (0.50-2.48)</b>                | <b>1.15 (0.50-2.64)</b>                |
|                                                                                                                                              | Left atrial size (per SD <sup>+</sup> increase) | <b>1.07 (0.78-1.46)</b>                | <b>1.13 (0.82-1.55)</b>                |
| Recurrent cardioembolic or cryptogenic stroke                                                                                                | Normal left atrial size                         | reference                              | reference                              |
|                                                                                                                                              | Mild left atrial enlargement                    | 1.26 (0.48-3.32)                       | 1.77 (0.65-4.81)                       |
|                                                                                                                                              | Moderate to severe left atrial enlargement      | 2.70 (0.97-7.54)                       | 3.44 (1.14-10.31)                      |
|                                                                                                                                              | Left atrial size (per SD increase)              | 1.54 (1.00-2.38)                       | 1.68 (1.07-2.64)                       |

\*model 1: adjusted for age, sex, race-ethnicity, diabetes, hypercholesterolemia, smoking, atrial fibrillation, congestive heart failure, systolic blood pressure, diastolic blood pressure, body mass index and antihypertensive medications on discharge

\*\*model 2: adjusted for age, sex, race-ethnicity, hypertension, diabetes, hypercholesterolemia, smoking, atrial fibrillation, congestive heart failure, and anticoagulant use on discharge. For this model, the analytic cohort included 465 patients with information on anticoagulant use at discharge available.
